# Supplementary material
Source: Springer Nature journal article supplement (https://www.springermedizin.de/resource/supplementary/12939_2013_408_MOESM1_ESM.pdf/9551086)

**Graph 1.1.** Modern CPR in urban Kenya by household wealth

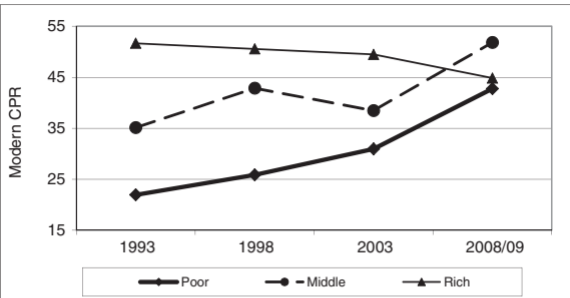

**Graph 1.2.** Modern CPR in urban Kenya by education

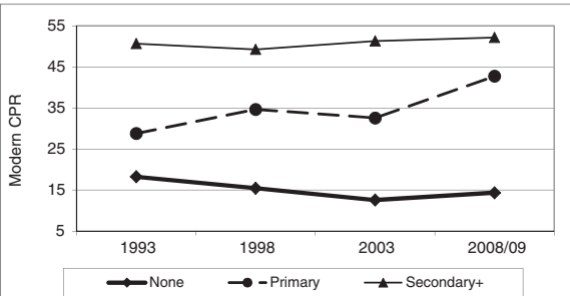

Supplement: MOESM1 [file 9551086]
